# Supplementary material for: A concise, efficient and accurate method for calculating the solid–liquid interfacial free energy
Source: Royal Society of Chemistry journal article supplement (doi:10.1039/d4cp04346d), 2025-01-01
Supplement: d4cp04346d1.pdf [file d4cp04346d1.pdf]

### The calculations of NpH phase diagrams

Three steps are required to calculate the NpH phase diagram from the MD simulation.

1. Perform a series of NVE MD simulations (constant atomic number  $N$ , volume  $V$  and total energy  $E$ ) of a solid-liquid bi-phase coexisting system to achieve the correlation of pressure and equilibrium melting point,  $p$ - $T_m$ , and fit the computational experimental data with a second order polynomial. In this case, the pressure is achieved by adjusting the volume of the system.

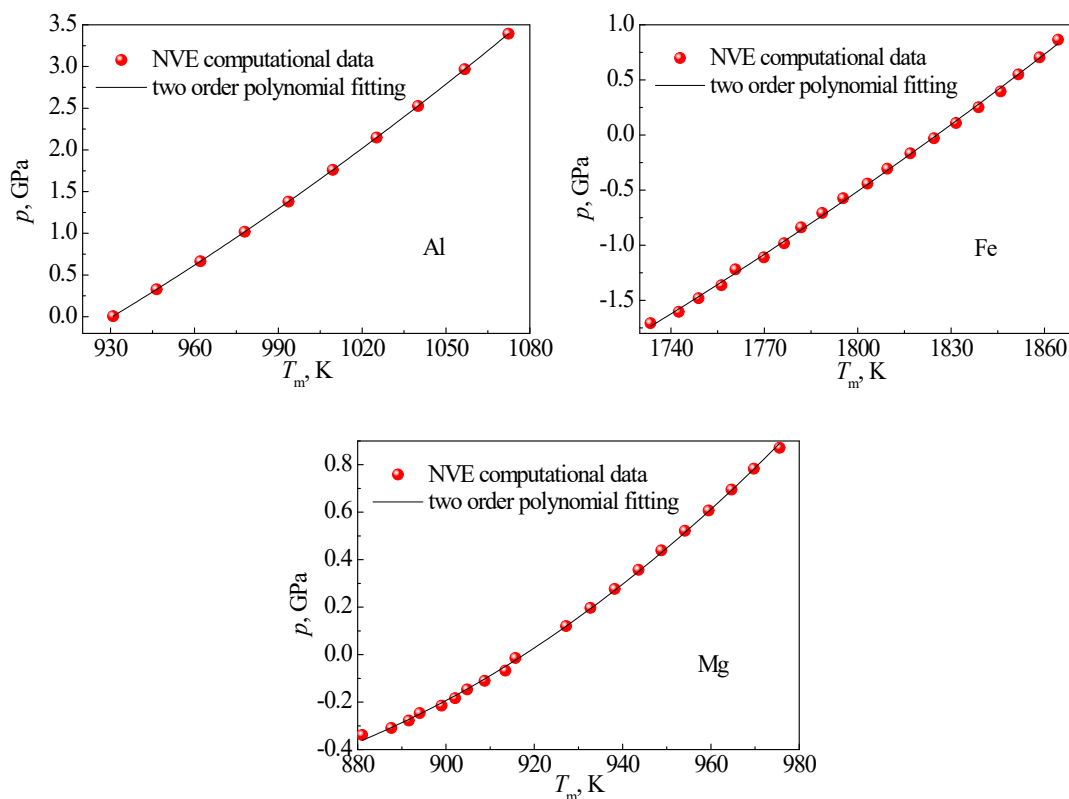

2. From the fitted polynomials, we can computer a series of  $p_i$ - $T_{m,i}$  data pairs. Then, perform a series of NpT MD simulations (constant atomic number, pressure and temperature) of single crystal and liquid phases with the imposed  $p_i$ - $T_{m,i}$  conditions to achieve potential energy  $P_i$ , kinetic energy  $K_i$  and volume  $v_i$ , and finally the enthalpy  $H_i = P_i + K_i + p_i v_i$ .

Al

| $i$ | $T$<br>K | $p$<br>GPa | $P_L$<br>eV/atom | $P_S$<br>eV/atom | $v_L$<br>$\text{\AA}^3/\text{atom}$ | $v_S$<br>$\text{\AA}^3/\text{atom}$ | $H_L$<br>eV/atom | $H_S$<br>eV/atom |
|-----|----------|------------|------------------|------------------|-------------------------------------|-------------------------------------|------------------|------------------|
| 1   | 930.89   | 0.005      | -3.029           | -3.141           | 18.701                              | 17.728                              | -2.908           | -3.020           |
| 2   | 946.46   | 0.328      | -3.028           | -3.139           | 18.594                              | 17.657                              | -2.868           | -2.980           |
| 3   | 962.12   | 0.665      | -3.026           | -3.137           | 18.491                              | 17.583                              | -2.825           | -2.940           |
| 4   | 977.99   | 1.018      | -3.024           | -3.134           | 18.383                              | 17.507                              | -2.781           | -2.896           |
| 5   | 993.65   | 1.380      | -3.022           | -3.131           | 18.278                              | 17.430                              | -2.736           | -2.852           |
| 6   | 1009.52  | 1.760      | -3.019           | -3.129           | 18.170                              | 17.350                              | -2.689           | -2.808           |
| 7   | 1025.18  | 2.148      | -3.017           | -3.126           | 18.063                              | 17.269                              | -2.642           | -2.762           |
| 8   | 1040     | 2.527      | -3.014           | -3.123           | 17.959                              | 17.190                              | -2.596           | -2.717           |
| 9   | 1056.71  | 2.967      | -3.011           | -3.119           | 17.843                              | 17.101                              | -2.544           | -2.665           |

Fe

| $i$ | $T$<br>K | $p$<br>GPa | $P_L$<br>eV/atom | $P_S$<br>eV/atom | $v_L$<br>$\text{\AA}^3/\text{atom}$ | $v_S$<br>$\text{\AA}^3/\text{atom}$ | $H_L$<br>eV/atom | $H_S$<br>eV/atom |
|-----|----------|------------|------------------|------------------|-------------------------------------|-------------------------------------|------------------|------------------|
| 1   | 1825.67  | 0.007      | -3.429           | -3.617           | 13.162                              | 12.290                              | -3.192           | -3.380           |
| 2   | 1829.5   | 0.085      | -3.429           | -3.616           | 13.151                              | 12.283                              | -3.186           | -3.373           |
| 3   | 1833.95  | 0.178      | -3.428           | -3.616           | 13.140                              | 12.276                              | -3.176           | -3.365           |
| 4   | 1838.41  | 0.271      | -3.428           | -3.615           | 13.128                              | 12.268                              | -3.168           | -3.357           |
| 5   | 1842.86  | 0.365      | -3.428           | -3.614           | 13.114                              | 12.261                              | -3.160           | -3.348           |
| 6   | 1847.32  | 0.460      | -3.427           | -3.614           | 13.102                              | 12.252                              | -3.151           | -3.340           |
| 7   | 1851.51  | 0.550      | -3.427           | -3.613           | 13.091                              | 12.245                              | -3.143           | -3.332           |
| 8   | 1855.71  | 0.640      | -3.427           | -3.613           | 13.079                              | 12.237                              | -3.135           | -3.324           |
| 9   | 1860.16  | 0.737      | -3.426           | -3.611           | 13.065                              | 12.230                              | -3.125           | -3.314           |

Mg

| $i$ | $T$<br>K | $p$<br>GPa | $P_L$<br>eV/atom | $P_S$<br>eV/atom | $v_L$<br>$\text{\AA}^3/\text{atom}$ | $v_S$<br>$\text{\AA}^3/\text{atom}$ | $H_L$<br>eV/atom | $H_S$<br>eV/atom |
|-----|----------|------------|------------------|------------------|-------------------------------------|-------------------------------------|------------------|------------------|
| 1   | 923.79   | 0.076      | -1.163           | -1.262           | 25.651                              | 24.251                              | -1.031           | -1.131           |
| 2   | 929.47   | 0.150      | -1.163           | -1.261           | 25.541                              | 24.199                              | -1.019           | -1.118           |
| 3   | 935.15   | 0.227      | -1.163           | -1.260           | 25.441                              | 24.145                              | -1.006           | -1.105           |
| 4   | 940.83   | 0.309      | -1.163           | -1.260           | 25.337                              | 24.088                              | -0.992           | -1.092           |
| 5   | 946.51   | 0.394      | -1.163           | -1.259           | 25.244                              | 24.028                              | -0.978           | -1.077           |
| 6   | 952.18   | 0.483      | -1.163           | -1.258           | 25.134                              | 23.966                              | -0.964           | -1.063           |
| 7   | 957.86   | 0.576      | -1.163           | -1.257           | 25.030                              | 23.901                              | -0.949           | -1.047           |
| 8   | 963.54   | 0.673      | -1.163           | -1.256           | 24.923                              | 23.834                              | -0.934           | -1.031           |
| 9   | 969.22   | 0.773      | -1.163           | -1.255           | 24.817                              | 23.765                              | -0.918           | -1.015           |

3. Finally, plot the lines of  $p-H_S$  and  $p-H_L$  to act as the solidus and liquidus so as to form the NpH phase diagram.

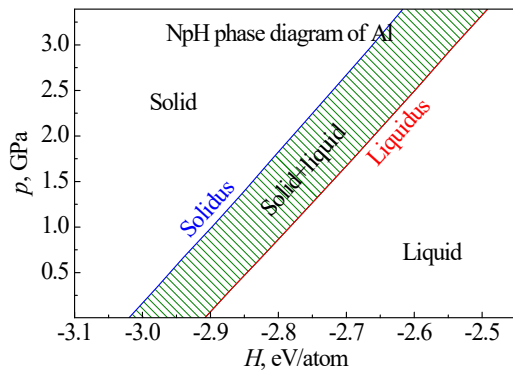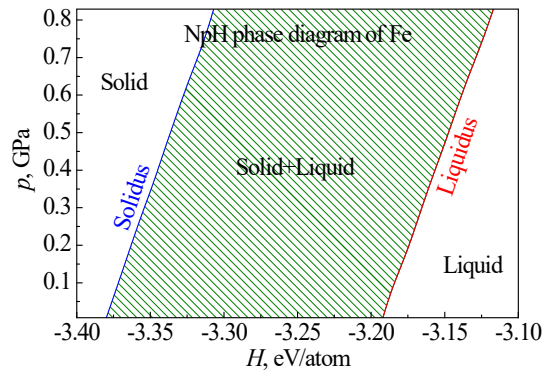

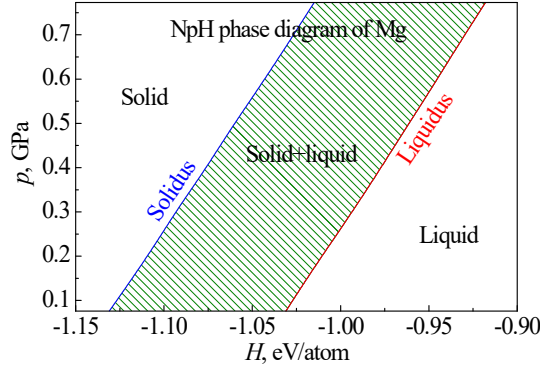

The rest data.

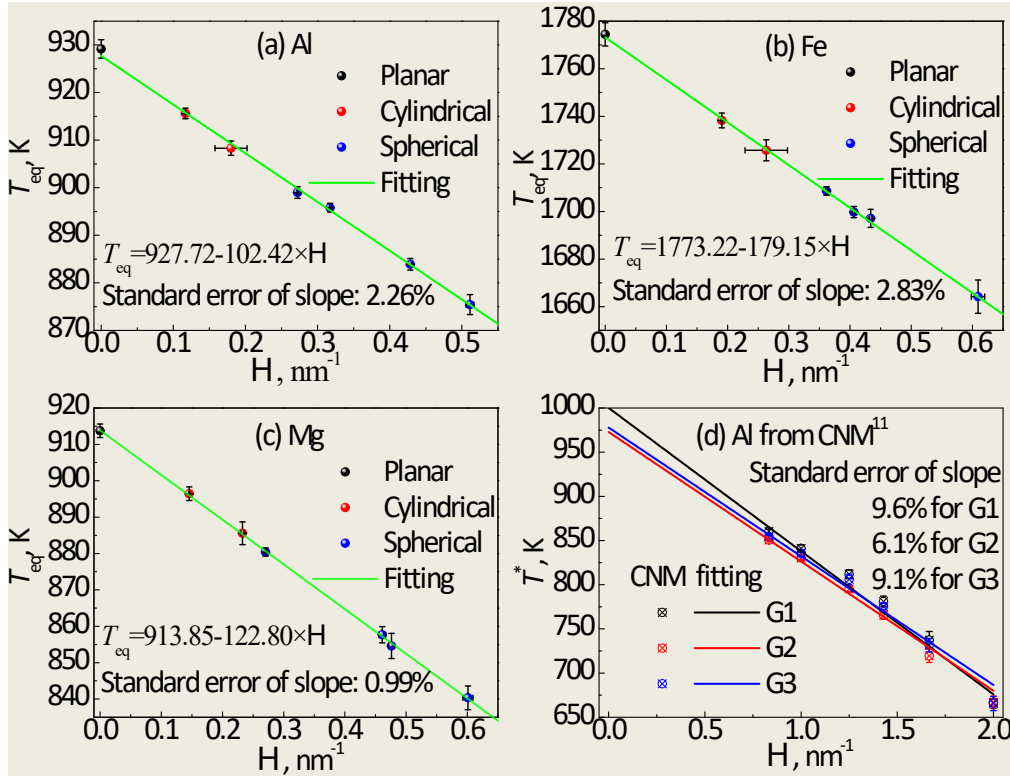

Table 1 The parameters required for the calculation of SL IFE according to SIM, the final results and the experimental and theoretical reference data.

| Metal | $T_m$ , K                         | $\Delta H_f$ , eV/atom | $\Delta S_f$ , eV/(atom·K) | $\Gamma$ , K·nm   | $\rho_s$ , nm <sup>-3</sup> |                        |                   |
|-------|-----------------------------------|------------------------|----------------------------|-------------------|-----------------------------|------------------------|-------------------|
| Al    | 929(2)                            | 0.1119(15)             | $1.21(2) \times 10^{-4}$   | 102(2)            | 56.41(11)                   |                        |                   |
| Fe    | 1777(4)                           | 0.1871(26)             | $1.05(1) \times 10^{-4}$   | 179(3)            | 80.23(6)                    |                        |                   |
| Mg    | 914(2)                            | 0.1002(12)             | $1.09(1) \times 10^{-4}$   | 123(1)            | 41.17(4)                    |                        |                   |
| Metal | $\gamma_{SL}$ , mJ/m <sup>2</sup> |                        |                            |                   |                             |                        |                   |
|       | This work                         | Exp. 1 <sup>*</sup>    | Exp. 2                     | Model             | CFM                         | CPM                    | CNM               |
| Al    | 112(2)                            | 93 <sup>3</sup>        | 163(21) <sup>6</sup>       | 155 <sup>28</sup> | 149 <sup>8</sup>            | -                      | 163 <sup>29</sup> |
| Fe    | 241(4)                            | 204 <sup>3</sup>       | -                          | 241 <sup>28</sup> | 175(11) <sup>9</sup>        | 193.5(4) <sup>27</sup> | 170 <sup>30</sup> |
| Mg    | 89(1)                             | -                      | -                          | 100 <sup>28</sup> | 89.9 <sup>25</sup>          | -                      | -                 |

<sup>\*</sup> Exp. 1: maximum undercooling; Exp. 2: grain boundary groove method; Model: Turnbull model.
